# Supplementary material for: Supplementation with the Symbiotic Formulation Prodefen® Increases Neuronal Nitric Oxide Synthase and Decreases Oxidative Stress in Superior Mesenteric Artery from Spontaneously Hypertensive Rats
Source: MDPI journal article supplement (doi:10.3390/antiox11040680), 2022-03-30
Supplement: s1 [file s1]

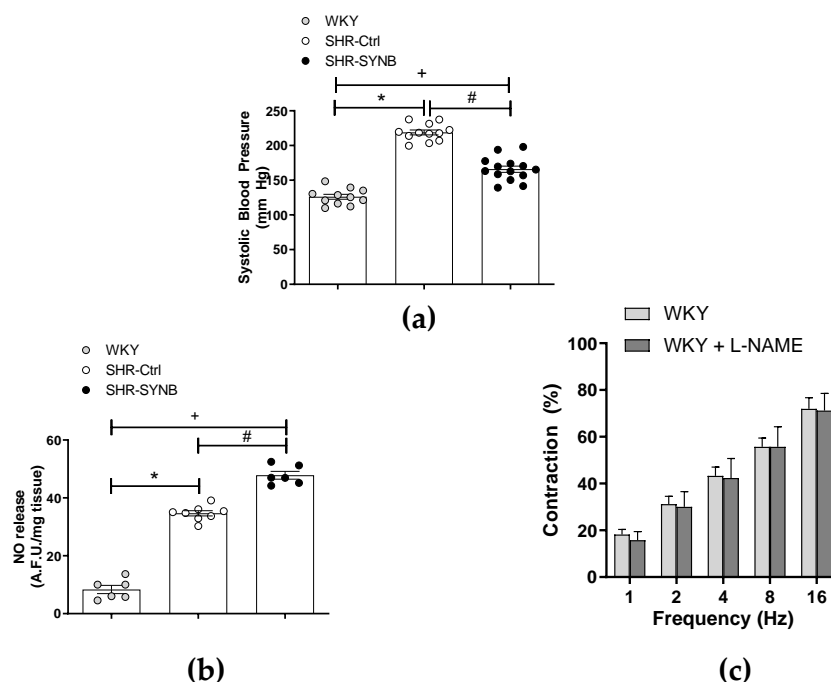

**Figure S1.** (a) Systolic blood pressure from WKY, SHR-Ctrl and SHR-SYNB animals (Mean + S.E.M.;  $n = 11-14$  animals each group) expressed in mm Hg. One-way ANOVA, followed by a Tukey post-hoc test was used as a statistical analysis. \*  $p < 0.05$  WKY vs. SHR-Ctrl; #  $p < 0.05$  SHR-Ctrl vs. SHR-SYNB. +  $p < 0.05$  WKY vs. SHR-SYNB. (b) EFS-induced NO release in mesenteric segments from WKY, SHR-Ctrl and SHR-SYNB animals (Mean + S.E.M.;  $n = 11-14$  animals each group) expressed in arbitrary fluorescence units (A.F.U.)/mg tissue. One-way ANOVA, followed by a Tukey post-hoc test was used as a statistical analysis. \*  $p < 0.05$  WKY vs. SHR-Ctrl; #  $p < 0.05$  SHR-Ctrl vs. SHR-SYNB. +  $p < 0.05$  WKY vs. SHR-SYNB (c) Analysis of the functional role of neuronal NO on EFS-induced vasoconstriction by preincubation with the unspecific nitric oxide synthase (NOS) inhibitor L-NAME, in mesenteric arteries WKY rats. Results (mean  $\pm$  S.E.M.) are expressed as a percentage of previous tone induced by KCl.  $n = 6$  segments from different animals in each experimental group.
